1  
2  
3  
4  
5  
6  
7  
8  
9  
10  
11  
12  
13  
14  
15  
16  
17  
18  
19  
20  
21  
22  
23  
24  
25  
26  
27  
28  
29  
30  
31  
32  
33  
34  
35  
36  
37  
38

## ***Chrna5* is essential for a rapid and protected response to optogenetic release of endogenous acetylcholine in prefrontal cortex**

Sridevi Venkatesan<sup>1</sup> and Evelyn K. Lambe<sup>1,2,3</sup>

(1) Department of Physiology, (2) Department of OBGYN, (3) Department of Psychiatry, University of Toronto, Toronto ON, Canada M5S 1A8

### Corresponding author:

E.K. Lambe, Ph.D.

1 King's College Circle

Toronto ON

Canada M5S 1A8

(416) 946-0910

Email: [evelyn.lambe@utoronto.ca](mailto:evelyn.lambe@utoronto.ca)

Pages: 23

Figures: 6

Table: 1

Words: Abstract (250), Introduction (643), Discussion (1270)

**Conflicts of interest:** None

**Acknowledgements:** This research was funded by the Canadian Institutes of Health Research (CIHR MOP 89825, EKL), the Canada Research Chair in Developmental Cortical Physiology (EKL), and the Mary Beatty Fellowship from the University of Toronto (SV). We thank Ms. Janice McNabb and Mr. Ha-Seul Jeong for expert technical assistance. Earlier presentations of this work received valuable feedback from Dr. Junchul Kim, Dr. Beverly Orser, and Dr. Steve Prescott of the University of Toronto.

39 **Abstract**

40 Optimal attention performance requires cholinergic modulation of corticothalamic neurons in the  
41 prefrontal cortex. These pyramidal cells express specialized nicotinic acetylcholine receptors  
42 containing the  $\alpha 5$  subunit encoded by *Chrna5*. Disruption of this gene impairs attention, but the  
43 advantage  $\alpha 5$  confers for the detection of *endogenous* cholinergic signaling is unknown. To  
44 ascertain this underlying mechanism, we used optogenetics to stimulate cholinergic afferents in  
45 prefrontal cortex brain slices from compound-transgenic wild-type and *Chrna5* knockout mice of  
46 both sexes. These electrophysiological experiments identify that *Chrna5* is critical for the *rapid*  
47 *onset* of the postsynaptic cholinergic response. Loss of  $\alpha 5$  slows cholinergic excitation and delays  
48 its peak, and these effects are observed in two different optogenetic mouse lines. Disruption of  
49 *Chrna5* does not otherwise perturb the magnitude of the response, which remains strongly mediated  
50 by nicotinic receptors and tightly controlled by autoinhibition via muscarinic M2 receptors.  
51 However, when conditions are altered to promote *sustained* cholinergic receptor stimulation, it  
52 becomes evident that  $\alpha 5$  also works to protect nicotinic responses against *desensitization*. Rescuing  
53 *Chrna5* disruption thus presents the double challenge of improving the onset of cholinergic  
54 signaling without triggering desensitization. Here, we identify that an agonist for the unorthodox  
55  $\alpha$ - $\alpha$  nicotinic binding site can allosterically enhance this cholinergic pathway considered vital for  
56 attention. Minimal NS9283 treatment restores the rapid onset of the postsynaptic cholinergic  
57 response without triggering desensitization. Taken together, this work demonstrates the advantages  
58 of speed and resilience that *Chrna5* confers on endogenous cholinergic signaling, defining a critical  
59 window of interest for cue detection and attentional processing.

60

61 **Significance statement**

62 The  $\alpha 5$  nicotinic receptor subunit (*Chrna5*) is important for attention, but its advantage in detecting  
63 endogenous cholinergic signals is unknown. Here, we show that  $\alpha 5$  subunits permit rapid  
64 cholinergic responses in prefrontal cortex and protect these responses from desensitization. Our  
65 findings clarify why *Chrna5* is required for optimal attentional performance under demanding  
66 conditions. To treat the deficit arising from *Chrna5* disruption without triggering desensitization,  
67 we enhanced nicotinic receptor affinity using NS9283 stimulation at the unorthodox  $\alpha$ - $\alpha$  nicotinic  
68 binding site. This approach successfully restored the rapid-onset kinetics of endogenous  
69 cholinergic neurotransmission. In summary, we reveal a previously unknown role of *Chrna5* as  
70 well as an effective approach to compensate for genetic disruption and permit fast cholinergic  
71 excitation of prefrontal attention circuits.

72

73

74

75

76

## 77 **Introduction**

78 The medial prefrontal cortex (PFC) is essential for working memory and top-down attention  
79 (Goldman-Rakic, 1995; Miller and Cohen, 2001; Dalley et al., 2004). Cholinergic neuromodulation  
80 of the prefrontal cortex by projections from the basal forebrain is required for attention (Dalley et  
81 al., 2004). These projections release acetylcholine during successful cue detection and performance  
82 of sustained attention tasks (Himmelheber et al., 2000; Parikh et al., 2007; Gritton et al., 2016;  
83 Howe et al., 2017). Corticothalamic neurons in layer 6 are excited by such acetylcholine release  
84 (Kassam et al. 2008; Hedrick and Waters, 2015; Sparks et al., 2018). They express the specialized  
85  $\alpha 5$  nicotinic receptor subunit encoded by *Chrna5* (Wada et al., 1990; Winzer-Serhan and Leslie,  
86 2005) in addition to the more commonly-expressed  $\alpha 4$  and  $\beta 2$  subunits of high-affinity nicotinic  
87 receptors. The  $\alpha 5$  subunit has been shown to increase calcium permeability and sensitivity of  $\alpha 4\beta 2^*$   
88 nicotinic receptors to acetylcholine in cell systems (Tapia et al., 2007; Kuryatov et al., 2008) and  
89 to boost the response to exogenous stimulation *ex vivo* in mouse prefrontal cortex (Bailey et al.,  
90 2010; Tian et al., 2011). However, the impact of the  $\alpha 5$  subunit on synaptic cholinergic  
91 neurotransmission in prefrontal cortex is unknown.

92 Behavioural and genetic evidence suggest that the  $\alpha 5$  nicotinic subunit plays a role in  
93 attention and more generally in prefrontal executive function. Mice lacking *Chrna5* display  
94 attention deficits in the 5 choice serial reaction time test, exhibiting a failure to detect cues when  
95 the task difficulty is increased to make cue duration shorter (Bailey et al., 2010). Work in rats has  
96 also confirmed that *Chrna5* is important for performing demanding attention tasks (Howe et al.,  
97 2018). Human polymorphisms in *Chrna5* that affect receptor functionality are associated with a  
98 cognitive phenotype that increases early experimentation with smoking and risk for addiction  
99 (Bierut et al., 2008), as well as increased risks of schizophrenia, cognitive impairments and  
100 attention deficit hyperactivity disorder (Hong et al., 2011; Schuch et al., 2016; Han et al., 2019).

101 Despite the link with attention and prefrontal cognitive processes, the role of *Chrna5* in  
102 responding to endogenous acetylcholine release has yet to be examined. Most  $\alpha 5$  characterization  
103 relies on heterologous expression systems and not the natural environment of nicotinic receptors  
104 in neurons (Baenziger and daCosta, 2013). While there is tight control over trafficking of  
105 cholinergic receptors (Matta et al., 2017), the lack of validated antibodies for immuno-electron  
106 microscopy means the relationship between  $\alpha 5$  and cholinergic afferents is unknown. Functional  
107 examination lacks a specific pharmacological tool to discriminate  $\alpha 5$  subunit-containing nicotinic  
108 receptors. Studies characterizing cholinergic functionality in  $\alpha 5$  knockout mice have used  
109 exogenous applications of acetylcholine that differ vastly from the rapid timescales of endogenous  
110 neurotransmission (Parikh et al., 2007). Thus, there is a gap in our understanding of the role of  
111 *Chrna5* in cholinergic modulation of attention circuits. The development of optogenetic tools to  
112 specifically express channelrhodopsin in cholinergic neurons (Zhao et al., 2011a; Hedrick et al.,  
113 2016) allows us to overcome this gap and measure the function of the  $\alpha 5$  subunit in endogenous  
114 cholinergic modulation.

115 To probe the advantage  $\alpha 5$  confers on endogenous cholinergic signaling, we  
116 optogenetically stimulated cholinergic afferents in prefrontal brain slices of compound transgenic  
117 wild-type and  $\alpha 5$  knockout mice. Concurrent whole cell electrophysiology shows that the  $\alpha 5$   
118 subunit is essential for achieving rapid kinetics of cholinergic neurotransmission. Under conditions

119 of prolonged stimulation, the  $\alpha 5$  subunit preserves the synaptic cholinergic response from  
120 desensitization. A pharmacological approach targeting the recently-discovered  $\alpha$ - $\alpha$  acetylcholine  
121 binding site on nicotinic receptors (Harpsøe et al., 2011; Wang et al., 2015; Mazzaferro et al., 2017)  
122 rescues onset-kinetics of the cholinergic response after  $\alpha 5$  disruption. Recent perspectives on  
123 cholinergic modulation have sought to shed light on the temporal scales of cholinergic signaling  
124 (Disney and Higley, 2020; Sarter and Lustig, 2020). In this context, our work reveals a critical and  
125 specialized role for the  $\alpha 5$  nicotinic receptor subunit in initiating rapid cholinergic signaling.

## 126 **Methods**

### 127 ***Animals***

128 In order to elicit endogenous acetylcholine release optogenetically and examine responses in  $\alpha 5$   
129 wild-type ( $\alpha 5$ WT) and  $\alpha 5$  knockout ( $\alpha 5$ KO) littermate mice, we created two compound transgenic  
130 mouse lines. Mouse crosses are illustrated in the respective figures using these mice. The first was  
131 achieved by crossing ChAT-ChR2 (JAX: 014546) (Zhao et al., 2011b) with  $\alpha 5$ KO mice (Salas et  
132 al., 2003) to achieve parents. These mice were crossed with  $\alpha 5$ HET mice to generate  $\alpha 5$ WT and  
133  $\alpha 5$ KO ChAT-ChR2/+ mice. We independently verified the results of optogenetic cholinergic  
134 stimulation using a different line of mice to express channelrhodopsin in cholinergic neurons.  
135 ChAT-IRES-Cre (JAX: 031661) and Ai32 mice (JAX: 012569) were each crossed with  $\alpha 5$ HET  
136 mice and their offspring were crossed with each other to generate littermate  $\alpha 5$ WT and  $\alpha 5$ KO  
137 ChAT-IRES-Cre/+ Ai32/+ mice. All animals were bred on a C57BL/6 background. Both male and  
138 female animals age >P60 were used. Mice were weaned at P21, separated based on sex, and group  
139 housed (2-4 mice per cage) and given ad libitum access to food and water on a 12-h light/dark cycle  
140 with lights on at 7 AM. Guidelines of the Canadian Council on Animal Care were followed, and  
141 all experimental procedures were approved by the Faculty of Medicine Animal Care Committee at  
142 the University of Toronto. A total of 92 mice were used for the entire study, with similar numbers  
143 of males and females.

### 144 ***Electrophysiology***

145 Animals were anesthetized with an intraperitoneal injection of chloral hydrate (400 mg/kg) and  
146 then decapitated. The brain was rapidly extracted in ice cold sucrose ACSF (254 mM sucrose, 10  
147 mM D-glucose, 26 mM NaHCO<sub>3</sub>, 2 mM CaCl<sub>2</sub>, 2 mM MgSO<sub>4</sub>, 3 mM KCl and 1.25 mM NaH<sub>2</sub>PO<sub>4</sub>).  
148 Coronal slices 400  $\mu$ m thick of prefrontal cortex (Bregma 2.2 - 1.1) were obtained on a Dosaka  
149 linear slicer (SciMedia, Costa Mesa, CA, USA). Slices were allowed to recover for at least 2 hours  
150 in oxygenated (95% O<sub>2</sub>, 5% CO<sub>2</sub>) ACSF (128 mM NaCl, 10 mM D-glucose, 26 Mm NaHCO<sub>3</sub>, 2  
151 mM CaCl<sub>2</sub>, 2 mM MgSO<sub>4</sub>, 3 Mm KCl, and 1.25 mM NaH<sub>2</sub>PO<sub>4</sub>) at 30°C before being used for  
152 electrophysiology.

153 For whole cell patch clamp electrophysiology, brain slices were transferred to a chamber  
154 mounted on the stage of a BX51WI microscope (Olympus, Tokyo, Japan) and constantly perfused  
155 with oxygenated ACSF at 30°C. Layer 6 pyramidal neurons were patched based on their  
156 morphology and the proximity to white matter. The recording electrodes (2 - 4 M $\Omega$ ) were filled  
157 with patch solution composed of 120 mM potassium gluconate, 5 mM KCl, 10 mM HEPES, 2 mM  
158 MgCl<sub>2</sub>, 4 mM K<sub>2</sub>-ATP, 0.4 mM Na<sub>2</sub>-GTP and 10 mM sodium phosphocreatine, pH adjusted to 7.3  
159 using KOH. Data were acquired with Multiclamp 700B amplifier at 20 kHz with Digidata 1440A

160 and pClamp 10.7 acquisition software (Molecular devices). All recordings were compensated for  
161 the liquid junction potential (14 mV). Layer 6 pyramidal responses were examined in voltage-  
162 clamp at -75 mV and in current-clamp at rest or starting from -70 mV.

163 There are two distinct population of pyramidal neurons in layer 6 which differ in their  
164 spiking pattern to current injection – regular spiking corticothalamic neurons and doublet spiking  
165 corticocortical neurons (Kumar and Ohana, 2008; Ledergerber and Larkum, 2010; Thomson,  
166 2010). As previously reported using endogenous (Hedrick and Waters, 2015) and exogenous  
167 acetylcholine (Yang et al., 2019), we found that the corticocortical neurons exhibit a purely  
168 muscarinic receptor mediated hyperpolarization, while regular spiking corticothalamic neurons  
169 exhibit nicotinic receptor mediated depolarization. Therefore, our experiments focused on the  
170 regular spiking corticothalamic pyramidal neurons to characterize the role of  $\alpha 5$  subunit containing  
171 nicotinic receptors in the response to endogenous acetylcholine release.

### 172 *Optogenetics*

173 To excite channelrhodopsin containing axonal fibers, blue light (473 nm) was delivered in brief  
174 pulses (5 ms) with an LED (Thorlabs, 2 mW) through the 60X objective lens. 8 pulses of light, 5  
175 ms each were delivered in a frequency accommodating manner, starting at 50 Hz and ending in 10  
176 Hz to stimulate the cholinergic axons (Fig 1A – experimental schematic). This paradigm was  
177 intended to replicate the accommodating firing pattern of cholinergic neurons (Unal et al., 2012).  
178 As indicated, a subset of experiments alternatively used only a single pulse of light (5 ms).

### 179 *Pharmacology*

180 Atropine (200 nM, Sigma) was applied to block muscarinic receptors. AFDX-116 (300 nM, Tocris)  
181 was used to block M2 muscarinic receptors. Dihydro- $\beta$ -erythroidine (Dh $\beta$ E, 3  $\mu$ M, Tocris) was  
182 used to block  $\beta 2$  containing nicotinic receptors. CNQX (20  $\mu$ M, Alomone), APV (50  $\mu$ M,  
183 Alomone) and picrotoxin (50  $\mu$ M, Alomone) were used to block glutamate and GABA-A receptors.  
184 Diisopropylfluorophosphate (DFP, 20  $\mu$ M, Toronto Research Chemicals) was used to block  
185 acetylcholinesterase and induce spillover of acetylcholine. Nicotine (100 nM, Sigma) was used for  
186 desensitization experiments. All experiments with nicotine and DFP were done in the presence of  
187 atropine to isolate the nicotinic response. The selective agonist of the  $\alpha$ - $\alpha$  binding site, NS9283  
188 (100nM, Tocris) was used to restore rapid rise time of the nicotinic response in layer 6 neurons of  
189 the  $\alpha 5$ KO mice.

### 190 *Analysis and statistics*

191 Analysis of cholinergic responses was performed in Clampfit 10.2 (Molecular Devices) and  
192 Axograph. Raw traces were used for calculating the rising slope of the voltage-clamp response  
193 within 50 ms of light onset to get accurate measurement of the fast onset kinetics. Downsampled  
194 traces were used to fit double exponentials to the cholinergic responses and for representation.  
195 Exponential and linear fits to the responses were performed on Axograph. Magnitude of the  
196 cholinergic responses in voltage-clamp were determined by the peak current (pA) as well as the  
197 charge transferred (pC) into the cell which is measured as the area under the current response for  
198 1 s starting from the light onset. Graphpad Prism 8 was used for statistical analysis and plotting  
199 graphs. Genotype differences in parameters of the cholinergic responses between  $\alpha 5$ WT and  $\alpha 5$ KO  
200 were compared with two-tailed unpaired *t*-tests where applicable. Effect of pharmacological

201 manipulations in WT and  $\alpha 5$ KO were compared with Sidak's post-hoc test, and repeated measures/  
202 paired  $t$ -tests were used if the recordings were obtained from the same cell pre and post  
203 pharmacology. When comparing the effect of a drug (e.g. nicotine) across time between  $\alpha 5$ WT and  
204  $\alpha 5$ KO, data were analyzed using 2-way repeated measures ANOVA (or mixed-effects analysis in  
205 the case of missing time points for some cells) and Sidak's multiple comparisons test used to  
206 compare  $\alpha 5$ WT and  $\alpha 5$ KO at each time point or between the baseline condition and different time  
207 points of drug application within each genotype. All ANOVAs were performed with the Geisser  
208 Greenhouse correction for sphericity.  $P$  values  $< 0.05$  were considered statistically significant. Data  
209 are reported as mean  $\pm$  SEM.

## 210 **Results**

### 211 ***Chrna5 is critical for maintaining a rapid-onset response to endogenous acetylcholine***

212 In order to assess the contribution of the  $\alpha 5$  nicotinic subunit to endogenous cholinergic  
213 neurotransmission, we bred compound transgenic mice to achieve channelrhodopsin-labelled  
214 cholinergic fibers in littermate  $\alpha 5$ WT and  $\alpha 5$ KO mice, as illustrated in **Figure 1A**. We recorded  
215 regular-spiking pyramidal neurons in layer 6 to obtain a population of neurons known to have  
216 nicotinic acetylcholine receptors enriched for  $\alpha 5$  (Bailey et al., 2010), as illustrated by *Chrna5*  
217 expression in Figure 1B. Figure 1D shows a schematic of the hypothesized components of the  
218 cholinergic synapse onto these layer 6 pyramidal neurons based on available data (Levey et al.,  
219 1991; Zhang et al., 2002; Hedrick and Waters, 2015; Sparks et al., 2018). Since basal forebrain  
220 cholinergic neurons innervating the prefrontal cortex are thought to fire in brief bursts with spike  
221 frequency accommodation (Unal et al. 2012; Lee et al. 2005), we chose a pattern of optogenetic  
222 stimulation to mimic burst firing with 8 pulses of blue light (473 nm) delivered in a frequency-  
223 accommodating manner as illustrated in the schematic in Fig 1C.

224 Our examination of layer 6 neuron cholinergic responses to optogenetic stimulation  
225 revealed that there were distinct differences in the onset kinetics between the  $\alpha 5$ WT and  $\alpha 5$ KO.  
226 We fit a line to the fast-rising phase of the cholinergic responses (initial 50 ms) to calculate the  
227 rising slope of the response (Fig 1E & G). The rising slope of the cholinergic current is significantly  
228 smaller in  $\alpha 5$ KO neurons ( $151 \pm 17$  pA/s) compared to the WT ( $233 \pm 32$  pA/s; unpaired  $t$ -test:  $t_{(27)}$   
229  $= 2.34$ ,  $*p = 0.02$ ;  $N = 7$  mice per genotype, Fig 1F). This difference in rising kinetics was also  
230 reflected in the current-clamp responses, with the  $\alpha 5$ KO having a significantly slower rising slope  
231 ( $40 \pm 5$  mV/s),  $\sim 50\%$  when compared to the WT neurons ( $79 \pm 14$  mV/s; unpaired  $t$ -test:  $t_{(50)}=2.68$ ,  
232  $**p = 0.001$ ; Fig 1H). This slower onset of cholinergic responses in the  $\alpha 5$ KO translates to a  
233 significant delay in cholinergic activation induced spiking (delay in onset of first spike in  $\alpha 5$ KO:  
234  $87 \pm 39$  ms; unpaired  $t$ -test comparing onset of first spike in WT and  $\alpha 5$ KO:  $t_{(14)} = 2.25$ ,  $*p = 0.04$ ).  
235 For both voltage-clamp and current-clamp examination, the peak response amplitudes themselves  
236 were not significantly different between the two genotypes (Peak current: unpaired  $t$ -test:  $t_{(26)} =$   
237  $0.38$ ,  $p = 0.70$ ; Peak depolarization: unpaired  $t$ -test:  $t_{(35)} = 1$ ,  $p = 0.34$ ). There were no sex  
238 differences nor sex-by-genotype interactions on any measure of the endogenous cholinergic  
239 response (data not shown). Furthermore, genotype differences in response onset kinetics were  
240 observed in the absence of genotype differences in passive electrophysiological properties (**Table**  
241 **1**). These results indicate that the  $\alpha 5$  subunit is critical for rapid onset of cholinergic activation in  
242 layer 6 of the prefrontal cortex.

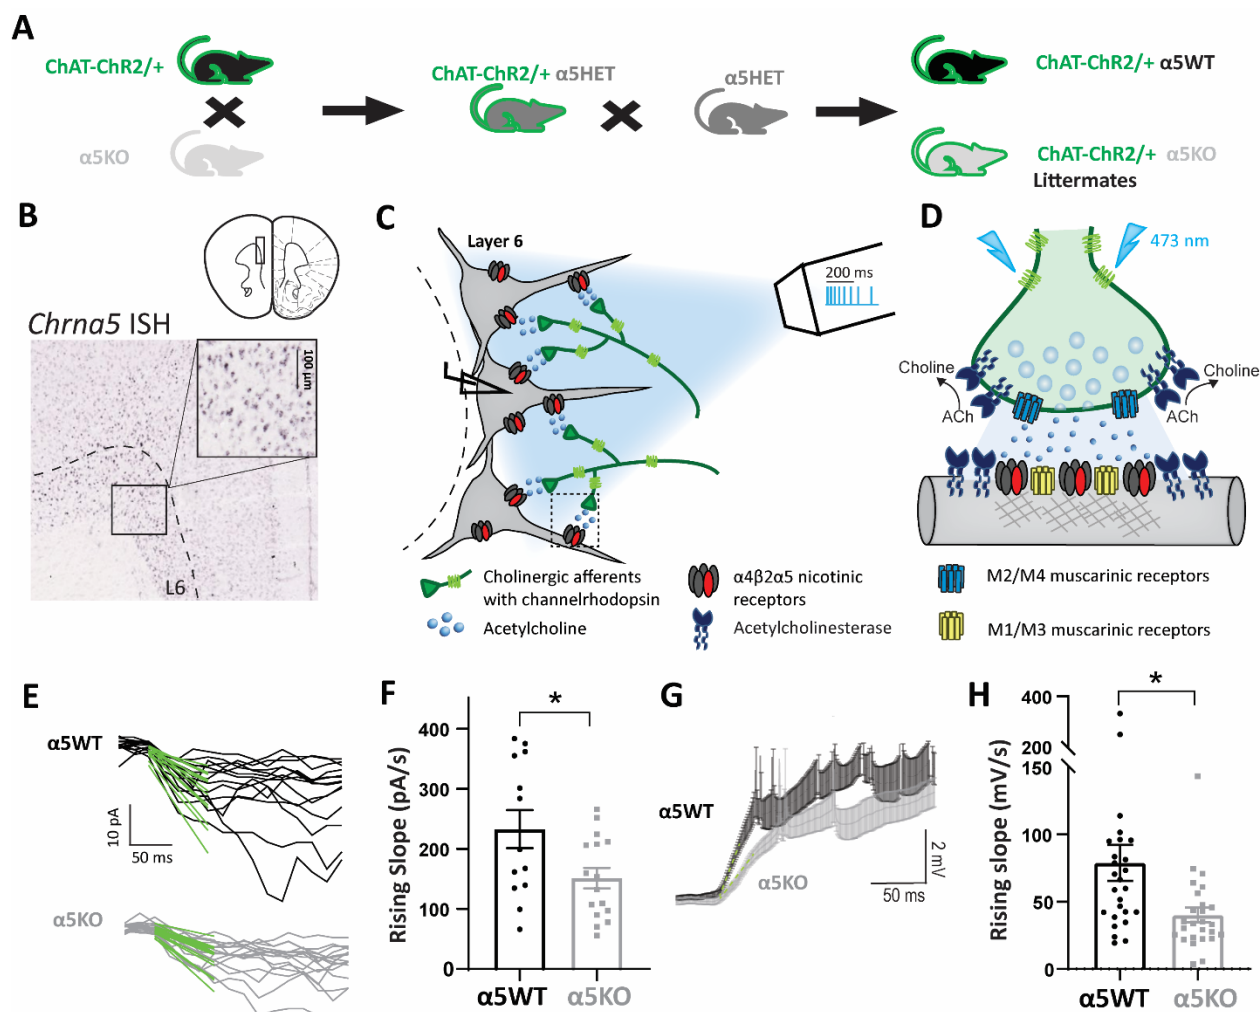

243  
244

245 **Figure 1: *Chrna5* is critical for maintaining rapid onset of the response to optogenetic acetylcholine**  
 246 **release.** **A**, Schematic showing mouse crosses to obtain littermate wildtype ( $\alpha$ 5WT) and  $\alpha$ 5 knockout  
 247 ( $\alpha$ 5KO) ChAT-ChR2 mice. **B**, *In situ* hybridization for *Chrna5* mRNA in mouse prefrontal cortex shows  
 248 expression in layer 6 neurons (Image from Allen Institute). Schematic showing coronal slice of mouse brain  
 249 is adapted from (Paxinos and Franklin, 2004). **C**, Schematic depicting experimental approach of whole cell  
 250 patch clamping of layer 6 pyramidal neurons in brain slices to measure responses to optogenetic release of  
 251 acetylcholine from cholinergic afferents expressing channelrhodopsin. Optogenetic stimulation pattern of 8  
 252 pulses (5 ms) in frequency accommodating manner (50 - 10 Hz) is shown with scale bar (legend and detailed  
 253 illustration of cholinergic synapses in D). **D**, Schematic showing optogenetic stimulation of a cholinergic  
 254 synapse causing acetylcholine release onto layer 6 pyramidal neurons in the prefrontal cortex. Different  
 255 effectors shown are postsynaptic nicotinic receptors with the *Chrna5* subunit ( $(\alpha 4)_2(\beta 2)_2\alpha 5$  receptors),  
 256 M1/M3 muscarinic receptors, presynaptic M2/M4 autoinhibitory muscarinic receptors and  
 257 acetylcholinesterase. **E**, Fast rising phase of cholinergic responses in voltage-clamp (-75 mV) in WT (top)  
 258 and  $\alpha$ 5KO (bottom) and linear fit (green) to the first 50 ms of the response from light onset. **F**, Bar graph  
 259 showing the rising slope (pA/s) of the current determined from the linear fit in WT and  $\alpha$ 5KO (unpaired t-  
 260 test:  $t_{(27)} = 2.34$ ,  $*p = 0.02$ ).  $\alpha$ 5KO show slower onset of cholinergic responses. **G**, Average current-clamp  
 261 response of WT and  $\alpha$ 5KO ( $n = 26$  cells each) layer 6 pyramidal neurons shows a slower rise in  $\alpha$ 5KO. **H**,

262 Bar graph showing the rising slope (mV/s) of the depolarization determined from the linear fit in WT and  
263  $\alpha 5$ KO (unpaired t-test:  $t_{(50)} = 2.68$ ,  $**p = 0.001$ ).  $\alpha 5$ KO show slower onset of cholinergic responses.

264  
265

|                                 | $\alpha 5$ WT<br>(7 mice) | $\alpha 5$ KO<br>(7 mice) | unpaired t-test           | Summary |
|---------------------------------|---------------------------|---------------------------|---------------------------|---------|
| Resting membrane potential (mV) | $-87 \pm 1$               | $-87 \pm 1$               | $t_{(76)} = 0.1, p = 0.9$ | ns      |
| Spike amplitude (mV)            | $78 \pm 2$                | $76 \pm 2$                | $t_{(76)} = 0.5, p = 0.6$ | ns      |
| Input resistance (MOhm)         | $140 \pm 7$               | $153 \pm 12$              | $t_{(76)} = 0.9, p = 0.3$ | ns      |
| Capacitance (pF)                | $73 \pm 4$                | $65 \pm 2$                | $t_{(76)} = 1.6, p = 0.1$ | ns      |
| Membrane time constant (ms)     | $10 \pm 1$                | $10 \pm 1$                | $t_{(76)} = 0.5, p = 0.6$ | ns      |

266 **Table 1: Electrophysiological properties of  $\alpha 5$ WT and  $\alpha 5$ KO layer 6 pyramidal neurons.** The intrinsic  
267 properties of layer 6 pyramidal neurons from Figure 1 did not differ statistically between  $\alpha 5$ WT and  $\alpha 5$ KO.

268

### 269 *Autoinhibitory control of layer 6 cholinergic release is strong and $\text{Chrna5}$ -independent*

270 Cholinergic synaptic transmission is likely to include activation of pre- and postsynaptic muscarinic  
271 receptors as shown in **Figure 2A**, and it has been suggested previously that  $\alpha 5$  knockouts can show  
272 compensatory increases in muscarinic excitability (Tian et al., 2011). Therefore, we examined the  
273 contribution of muscarinic receptors in the response to endogenous cholinergic neurotransmission.  
274 Of note, the pan-muscarinic receptor antagonist atropine increased the magnitude of the cholinergic  
275 responses in both genotypes (2 way repeated measures ANOVA, Effect of atropine:  $F_{(1,14)} = 30.87$ ,  
276  $**** p < 0.0001$ ,  $N = 5$ , 4 mice for  $\alpha 5$ WT,  $\alpha 5$ KO; Fig 2B & C). We hypothesized this overall  
277 response potentiation is due to the block of presynaptic autoinhibitory M2/M4 muscarinic receptors  
278 on cholinergic terminals. We tested this hypothesis by specifically blocking the M2 muscarinic  
279 receptor that is the main autoinhibitory receptor in the cortex (Levey et al., 1991; Zhang et al.,  
280 2002) using AFDX-116. Blocking M2 muscarinic receptors significantly potentiates the  
281 cholinergic response in both WT and  $\alpha 5$ KO (2 way repeated measures ANOVA: Effect of AFDX-  
282 116:  $F_{(1,6)} = 16.32$ ,  $**p = 0.007$ ) with no significant interaction between the effect of AFDX-116  
283 and genotype (AFDX-116 x Genotype interaction :  $F_{(1,6)} = 3.50$ ,  $p = 0.1$ , effect of genotype:  $F_{(1,6)}$   
284  $= 0.2$ ,  $p = 0.7$ ). These results suggest that cholinergic modulation of prefrontal layer 6 is under  
285 active regulation by presynaptic M2 muscarinic receptors in both genotypes.

286 The genotype differences in the kinetics of the cholinergic responses were still evident  
287 following block of muscarinic receptors, with the  $\alpha 5$ KO neurons showing significantly slower  
288 rising slope ( $170 \pm 23$  pA/s) compared to the WT ( $272 \pm 37$  pA/s, unpaired t-test:  $t_{(35)} = 2.40$ ,  $*p =$   
289  $0.02$ ; Fig 2F & H). The time of peak current, as measured from the exponential fits to the responses  
290 (Fig 2G & I) is significantly delayed by  $33.5 \pm 14.7$  ms in the  $\alpha 5$ KO compared to the WT (unpaired  
291 t-test:  $t_{(35)} = 2.27$ ,  $*p = 0.03$ ; Fig 2I). In addition to this slower onset observed both at baseline and  
292 in the presence of atropine, we also find that the  $\alpha 5$ KO showed a significantly greater decay time  
293 constant ( $675 \pm 65$  ms) compared to WT neurons ( $446 \pm 37$  ms; unpaired t-test:  $t_{(35)} = 2.93$ ,  $**p =$   
294  $0.006$ ; Fig 2J). Although the response kinetics were different between genotypes, the charge  
295 transfer did not differ by genotype either before or with atropine (Fig 2C) nor were there differences  
296 in the response pharmacology. Nicotinic receptor-mediated responses to acetylcholine release were



297 completely eliminated in both WT and  $\alpha 5$ KO (98% reduction) by the  $\beta 2$  nicotinic receptor  
 298 antagonist Dh $\beta$ E (2 way repeated measures ANOVA: Effect of Dh $\beta$ E :  $F_{(1,4)} = 38.96$ ,  $**p = 0.003$ ),  
 299 with no significant interaction nor main effect of genotype (effect of genotype:  $F_{(1,4)} = 0.27$ ,  $p =$   
 300  $0.6$ ; genotype x Dh $\beta$ E interaction:  $F_{(1,4)} = 0.11$ ,  $p = 0.8$ ). This indicates that in the absence of the  
 301  $\alpha 5$  subunit, the nicotinic receptors in the  $\alpha 5$ KO remain  $\beta 2$ -containing receptors.  
 302  
 303

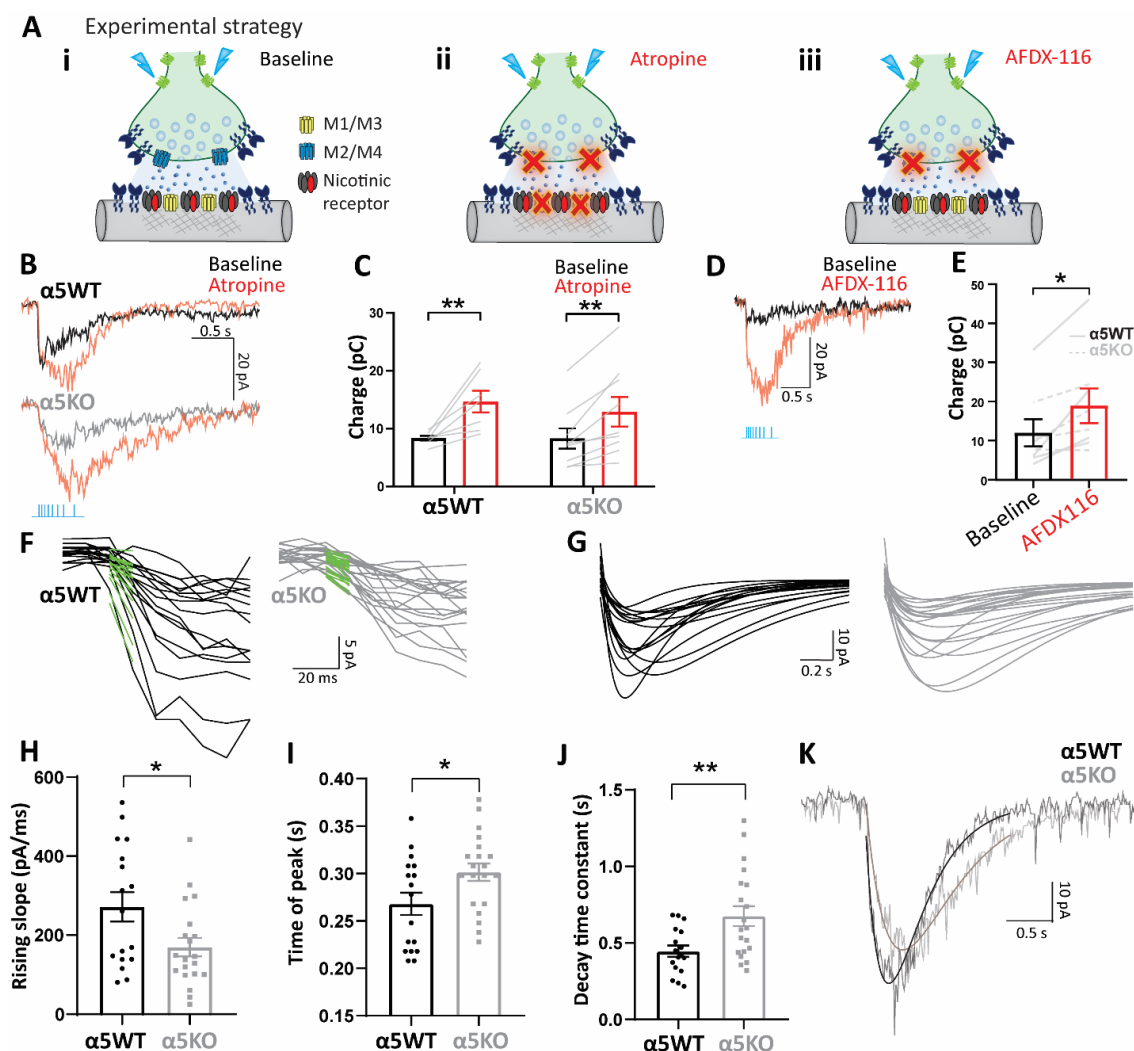

304  
 305  
 306 **Figure 2: Autoinhibition of optogenetically-released acetylcholine by M2 muscarinic receptors is**  
 307 **strong and *Chrna5*-independent.** **A i-iii**, Experimental schematic illustrating cholinergic synaptic  
 308 transmission at (i) baseline, (ii) when all muscarinic receptors both postsynaptic M1/M3 and presynaptic  
 309 M2/M4 are blocked by atropine and (iii) when presynaptic autoinhibitory M2/M4 muscarinic receptors are  
 310 selectively blocked by AFDX-116. **B**, Cholinergic response of a WT (top) and  $\alpha 5$ KO neuron (bottom) in  
 311 voltage-clamp before and after the application of atropine (200 nM). **C**, Bar graph showing cholinergic  
 312 current charge at baseline and after atropine in WT and  $\alpha 5$ KO. Atropine significantly increases cholinergic  
 313 current charge (2-way RM ANOVA: Effect of atropine:  $F_{(1,14)} = 30.87$ ,  $**** p < 0.0001$ ) in both WT  
 314 (Sidak's post-hoc test:  $t_{(14)} = 4.3$ ,  $**p = 0.002$ ) and  $\alpha 5$ KO (Sidak's post-hoc test:  $t_{(14)} = 3.5$ ,  $**p = 0.006$ ) to  
 315 the same extent. **D**, Cholinergic response of a WT neuron in voltage-clamp before and after the application

316 of M2 antagonist AFDX-116 (300 nM). **E**, Bar graph showing cholinergic current charge before and after  
317 the application of AFDX-116 in WT and  $\alpha 5$  KO. Blocking presynaptic autoinhibitory muscarinic receptors  
318 is sufficient to significantly increase cholinergic response magnitude in both WT and  $\alpha 5$ KO (paired  $t$ -test:  
319  $t_{(7)} = 3.47$ ,  $*p = 0.01$ ). **F**, Fast rising phase of cholinergic responses in WT (top) and  $\alpha 5$ KO (bottom) and  
320 linear fit (green) to the first 50 ms of the response from light onset after the application of atropine. **G**,  
321 Double exponential fits to cholinergic responses in WT (left) and  $\alpha 5$ KO (right) neurons. **H-J**, Bar graph  
322 showing the (H) rising slope (pA/s) of the current determined from the linear fit (unpaired  $t$ -test:  $t_{(35)} = 2.40$ ,  
323  $*p = 0.02$ ) (I) Time of peak current (unpaired  $t$ -test:  $t_{(35)} = 2.27$ ,  $*p = 0.03$ ) and (J) Decay time constant  
324 determined from double exponential fits (unpaired  $t$ -test:  $t_{(35)} = 2.93$ ,  $**p = 0.006$ ) of the cholinergic  
325 responses in WT and  $\alpha 5$ KO. **K**, Example cholinergic response with exponential fits of a WT and  $\alpha 5$ KO  
326 neuron illustrates slower onset, delayed peak and slower decay in  $\alpha 5$ KO.

327

### 328 ***Replication in a different optogenetic model: *Chrna5* is required for rapid cholinergic kinetics***

329 To test the robustness of the finding that  $\alpha 5$ KO mice show a selective deficit in kinetics of  
330 cholinergic activation, we repeated our experiments in a different line of mice targeting  
331 channelrhodopsin to cholinergic neurons. To create WT and  $\alpha 5$ KO offspring for these experiments,  
332 we bred compound crosses of  $\alpha 5$ het/ChAT-IRES-Cre and  $\alpha 5$ het/Ai32 mice as illustrated in **Figure**  
333 **3**. It has been recently reported that this fate-mapping approach will include a subset of neurons  
334 which are only cholinergic transiently during development and release glutamate in the adult  
335 (Nasirova et al., 2019). Therefore, we examined all recordings obtained in response to optogenetic  
336 stimulation for evidence of fast glutamatergic EPSCs time locked to the stimulus onset and  
337 included only recordings without such light-evoked EPSCs. We additionally performed a subset of  
338 experiments in the presence of glutamate receptor blockers CNQX and APV and found no  
339 significant differences from the data acquired without glutamate blockers (2 way repeated measures  
340 ANOVA: effect of CNQX+APV:  $F_{(1,7)} = 2.49$ ,  $p = 0.16$ ).

341 The ROSA26 promoter in ChAT-IRES-Cre/+ Ai32/+  $\alpha 5$ WT and  $\alpha 5$ KO expressed  
342 channelrhodopsin more strongly in the cholinergic afferents than the ChAT promoter, and a single  
343 pulse of light (5 ms) was sufficient to generate a cholinergic response of comparable magnitude to  
344 that examined in Fig 2. The average cholinergic current elicited in layer 6 pyramidal neurons by a  
345 single 5 ms pulse of light stimulation in  $\alpha 5$ WT ( $n = 12$  cells) and  $\alpha 5$ KO ( $n = 9$  cells) is shown in  
346 figure 3B ( $N = 4$  mice per genotype). Consistent with results from the  $\alpha 5$ KO ChAT-ChR2 mice,  
347 the cholinergic response in the  $\alpha 5$ KO is delayed compared to WT, with the rise time constant  
348 significantly greater in  $\alpha 5$ KO ( $48 \pm 11$  ms) compared to WT ( $38 \pm 8$  ms; unpaired  $t$ -test:  $t_{(19)} = 2.6$ ,  
349  $*p = 0.02$ ; Fig 3C i). Although the  $\alpha 5$ KO show slower rise, they attain a similar peak magnitude  
350 ( $28 \pm 4$  pA) as WT ( $29 \pm 3$  pA; unpaired  $t$ -test:  $t_{(19)} = 0.22$ ,  $p = 0.8$ ), but the  $\alpha 5$ KO peak occurs at  
351 a significantly delayed time point (delay in time of peak in  $\alpha 5$ KO:  $27.5 \pm 7$  ms; unpaired  $t$ -test  $t_{(19)}$   
352  $= 3.74$ ,  $**p = 0.001$ ; Fig 3C ii). The  $\alpha 5$ KO also show significantly slower decay time constant  
353 compared to WT ( $\alpha 5$ WT:  $353 \pm 16$  ms vs  $\alpha 5$ KO:  $438 \pm 20$  ms, unpaired  $t$ -test:  $t_{(29)} = 3.26$ ,  $**p =$   
354  $0.003$ ; Fig 3C iii). We are thus able to replicate the key deficits in cholinergic response kinetics  
355 observed in  $\alpha 5$ KO ChAT-ChR2 mice in  $\alpha 5$ KO ChAT-IRES-Cre/+ Ai32/+ mice. We conclude that  
356 *Chrna5* is essential to maintain the rapid onset of response to acetylcholine release in layer 6  
357 pyramidal neurons.

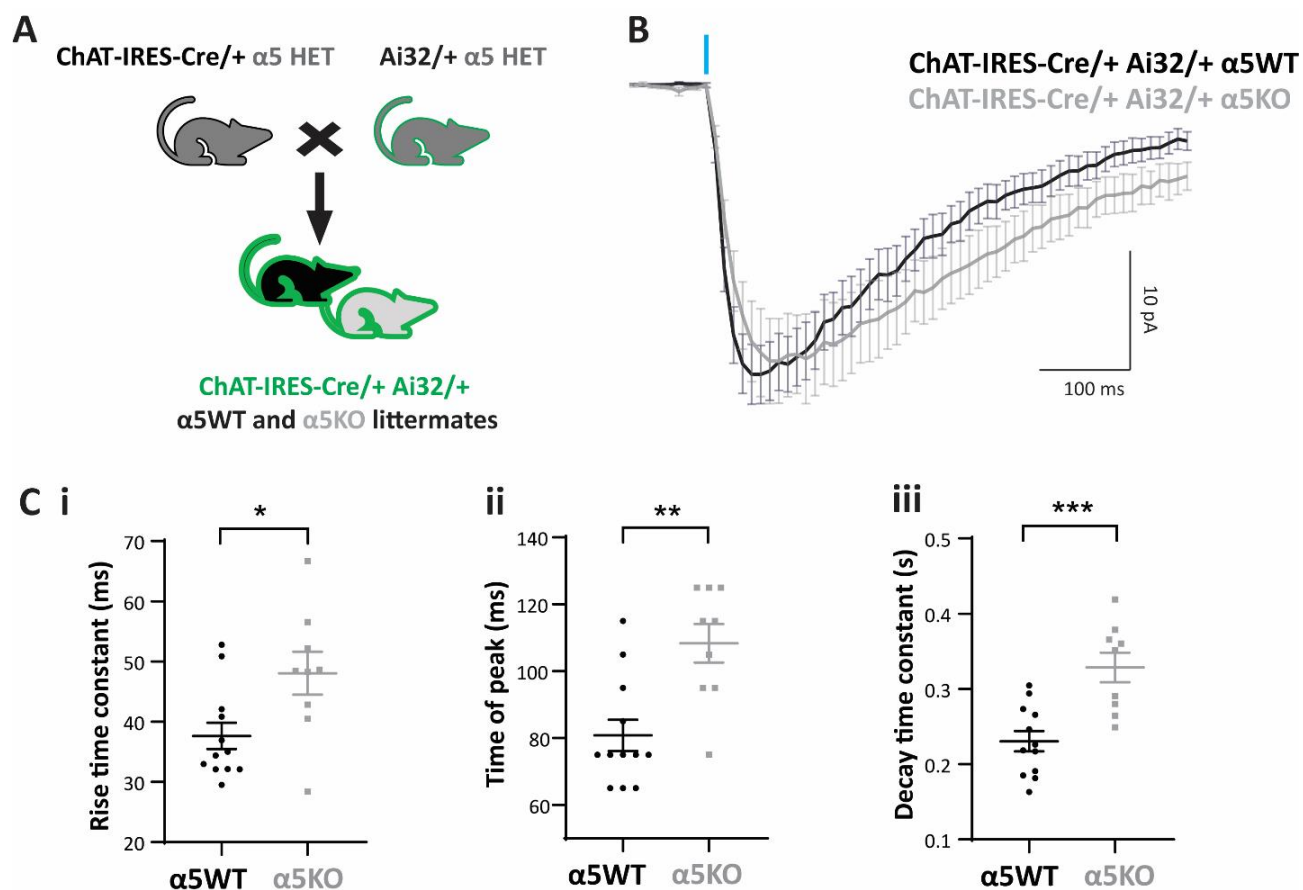

358

359

360 **Figure 3: *Chrna5* maintains rapid cholinergic kinetics in a different optogenetic model.** **A**, Schematic  
 361 showing mouse crosses to obtain littermate wildtype ( $\alpha 5$ WT) and  $\alpha 5$  knockout ( $\alpha 5$ KO) ChAT-IRES-Cre/+  
 362 Ai32/+ mice. **B**, Average cholinergic current obtained in response to one 5 ms flash of optogenetic  
 363 stimulation in  $\alpha 5$ WT ( $n = 12$ ) and  $\alpha 5$ KO ( $n = 9$ ) neurons in the presence of atropine. **C i-iii**, Bar graph  
 364 showing (i) rise time constant (unpaired t-test:  $t_{(19)} = 2.6$ ,  $*p = 0.02$ ) (ii) time of peak (unpaired t-test  $t_{(19)} =$   
 365  $3.74$ ,  $**p = 0.001$ ) and (iii) decay time constant (unpaired t-test:  $t_{(29)} = 3.26$ ,  $**p = 0.003$ ) in WT and  $\alpha 5$ KO.  
 366 Cholinergic responses in the  $\alpha 5$ KO have a slower rise, delayed peak, and slower decay compared to WT.

367

### 368 *Chrna5* protects endogenous cholinergic signaling against desensitization

369 Acetylcholine levels in the prefrontal cortex increase during attention, arousal, exploration and  
 370 other cognitive tasks, as well as during stress (Pepeu and Giovannini, 2004; Gritton et al., 2016;  
 371 Teles-Grilo Ruivo et al., 2017a). To understand the consequences of prolonged acetylcholine  
 372 presence occurring under situations of high cognitive effort, we blocked acetylcholine breakdown  
 373 by inhibiting acetylcholinesterase irreversibly with diisopropylfluorophosphate (DFP). We  
 374 measured layer 6 neuron responses to a train of optogenetic stimulation in WT and  $\alpha 5$ KO ChAT-  
 375 ChR2 mice before and after acetylcholinesterase inhibition with DFP, in the continuous presence  
 376 of atropine (**Figure 4A-C**). Blocking acetylcholinesterase causes the optogenetic cholinergic

377 responses to nearly double in the WT (cholinergic current charge at baseline:  $16 \pm 2$  pC, after DFP:  
378  $32 \pm 5$  pC; Sidak's post hoc test:  $t_{(58)} = 2.92$ ,  $*p = 0.01$ ;  $N = 5$  mice), but the increase was not  
379 significant in the  $\alpha 5$ KO (cholinergic current charge at baseline:  $13 \pm 2$  pC, after DFP:  $18 \pm 3$  pC;  
380  $t_{(58)} = 0.85$ ,  $p = 0.64$ ;  $N = 3$  mice; Fig 4C). Overall, there were significant main effects of DFP and  
381 genotype on the charge transfer from the optogenetic cholinergic response, (2-way ANOVA: effect  
382 of DFP:  $F_{(1,58)} = 7.29$ ,  $**p = 0.009$ ; effect of genotype:  $F_{(1,58)} = 5.90$ ,  $*p = 0.02$ ; DFP x genotype  
383 interaction:  $F_{(1,58)} = 2.34$ ,  $p = 0.13$ ). Post-hoc comparison shows that after acetylcholinesterase  
384 inhibition, the cholinergic charge transfer is significantly lower in  $\alpha 5$ KO ( $18 \pm 3$  pC) compared to  
385 WT ( $32 \pm 5$  pC, Sidak's post hoc test:  $t_{(58)} = 3$ ,  $**p = 0.008$ ). These responses to endogenous  
386 acetylcholine release in the presence of cholinesterase inhibitors are reminiscent of genotype  
387 differences observed for direct responses to exogenous acetylcholine application (Bailey et al.,  
388 2010), where there is a prolonged high concentration of acetylcholine at the synapse due to  
389 saturation of acetylcholinesterase.

390 We hypothesized that this *Chrna5* genotype difference in the ability of the optogenetic  
391 response to withstand prolonged exposure to acetylcholine reflects a difference in nicotinic receptor  
392 desensitization. To test this hypothesis, we treated the brain slice with the drug nicotine, which is  
393 well known to desensitize nicotinic receptors in the cortex (Quick and Lester, 2002; Paradiso and  
394 Steinbach, 2003; Picciotto et al., 2008), for 10 min at a concentration known to predominantly exert  
395 desensitizing effects in this neuronal population (100 nM; Bailey et al., 2010). The WT optogenetic  
396 cholinergic response was unchanged by application of nicotine; whereas the  $\alpha 5$ KO optogenetic  
397 response, was rapidly attenuated (Fig 4D-G). The cholinergic current charge measured in the WT  
398 and  $\alpha 5$ KO before and after the application of nicotine shows a significant interaction between the  
399 effect of nicotine and the genotype (2 way repeated measures ANOVA: Nicotine x genotype  
400 interaction:  $F_{(1,16)} = 9.8$ ,  $**p = 0.006$ ). Post hoc comparisons show that the WT response is not  
401 significantly different before and after nicotine ( $12 \pm 1$  pC vs  $11 \pm 2$  pC, Sidak's post hoc test:  $t_{(16)}$   
402  $= 0.61$ ,  $p = 0.8$ ;  $N = 7$  mice) whereas the  $\alpha 5$ KO response is greatly reduced post nicotine ( $9 \pm 0.5$   
403 pC vs  $2 \pm 0.6$  pC,  $t_{(16)} = 5.39$ ,  $***p < 0.001$ ;  $N = 5$  mice; Fig 4F). We conclude that the elimination  
404 of endogenous cholinergic responses in the  $\alpha 5$ KO following acute exposure to nicotine is due to  
405 desensitization of nicotinic receptors lacking the  $\alpha 5$  subunit. Thus, *Chrna5* is essential to protect  
406 prefrontal endogenous cholinergic signaling from desensitization induced either by high  
407 acetylcholine levels or acute exposure to nicotine.

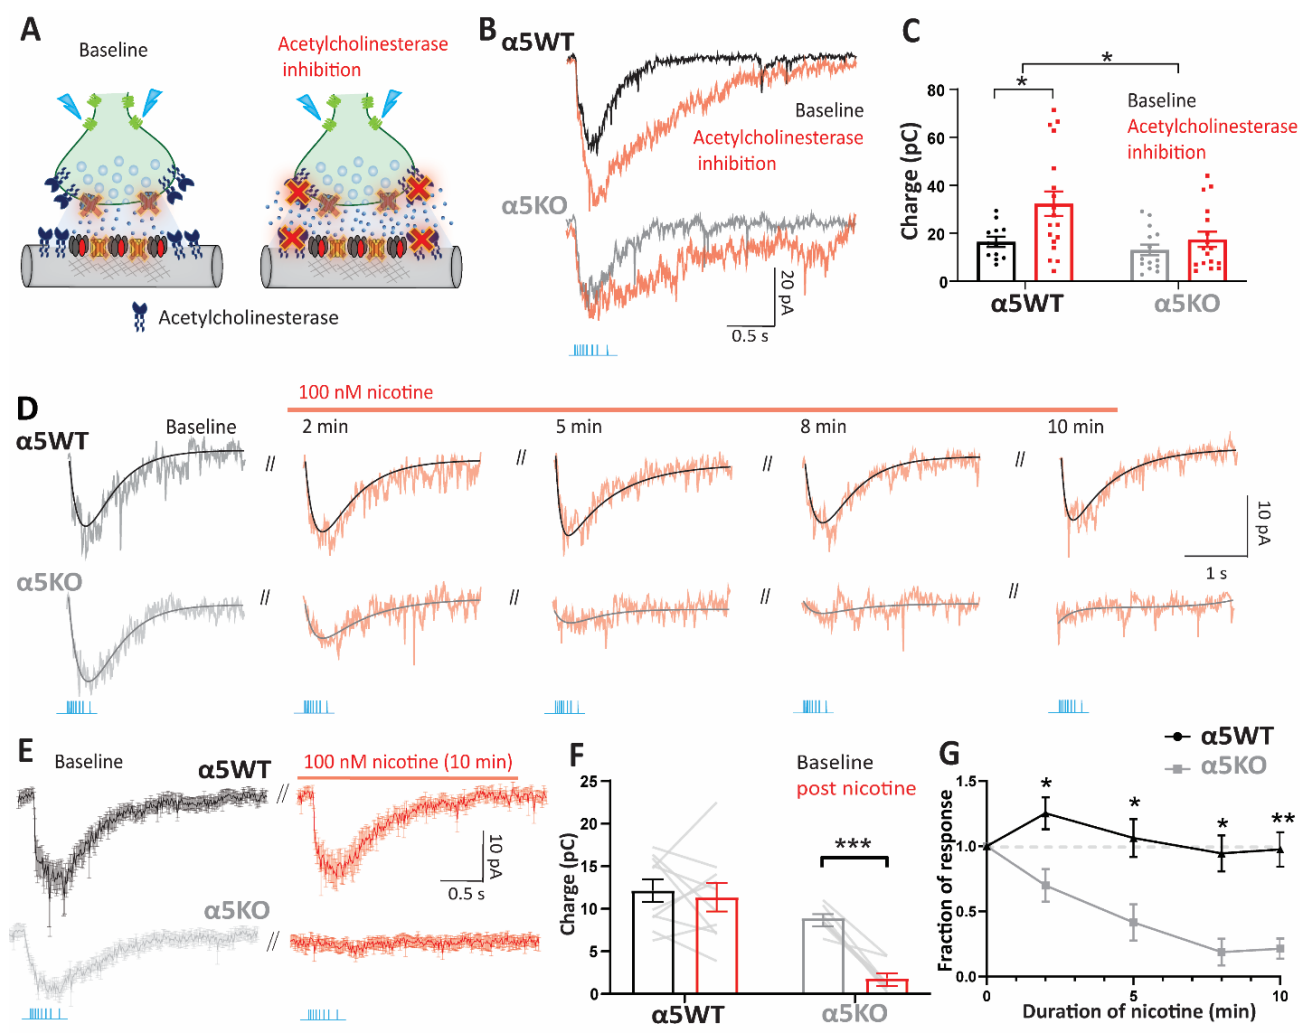

408

409 **Figure 4. *Chrna5* protects endogenous cholinergic signaling against desensitization.** **A**, Experimental  
 410 schematic illustrating nicotinic synaptic transmission at baseline when muscarinic receptors are blocked by  
 411 atropine and following the application of an acetylcholinesterase inhibitor (DFP) to prevent breakdown of  
 412 acetylcholine. **B**, Nicotinic response of a WT (top) and  $\alpha 5KO$  neuron (bottom) in voltage-clamp before and  
 413 after the application of the acetylcholinesterase inhibitor DFP (20  $\mu M$ ). **C**, Bar graph showing nicotinic  
 414 current charge in WT and  $\alpha 5KO$  at baseline and in the presence of DFP. There was a significant effect of  
 415 acetylcholinesterase inhibition on the cholinergic responses (2- way ANOVA: Effect of DFP:  $F_{(1,58)} = 7.29$ ,  
 416  $**p = 0.009$ ), but also a significant effect of genotype ( $F_{(1,58)} = 5.90$ ,  $*p = 0.02$ ). Cholinesterase inhibition  
 417 caused a significant increase in the magnitude of cholinergic responses in WT (Sidak's post hoc test:  $t_{(58)} =$   
 418  $2.92$ ,  $*p = 0.01$ ), but did not enhance cholinergic responses in the  $\alpha 5KO$  ( $t_{(58)} = 0.85$ ,  $p = 0.64$ ). **D**,  
 419 Optogenetically evoked nicotinic responses with their exponential fits in  $\alpha 5WT$  and KO at different time  
 420 points during the application of 100 nM nicotine for 10 minutes. **E**, Average nicotinic current in response  
 421 to optogenetic acetylcholine release in  $\alpha 5WT$  ( $n = 5$ ) and  $\alpha 5KO$  ( $n = 6$ ) neurons before and after 10 min  
 422 nicotine. **F**, Bar graph showing nicotinic current charge before and after 10 min nicotine in WT and  $\alpha 5KO$   
 423 (2-way RM ANOVA: Genotype x nicotine interaction:  $F_{(1,11)} = 12.56$ ,  $**p < 0.01$ , Sidak's post hoc  
 424 comparison of baseline and post-nicotine responses in WT:  $p = 0.9$ , in  $\alpha 5KO$ :  $***p < 0.001$ ). **G**, Time course  
 425 of change in endogenous nicotinic response as nicotine is applied (Sidak's posthoc test comparing WT and  
 426  $\alpha 5KO$ :  $*p < 0.05$   $**p < 0.01$ ).

427 ***Replication in a different optogenetic model: Chrna5 limits desensitization***

428 We tested the robustness of our observation that  $\alpha 5$ KO endogenous cholinergic responses are more  
429 vulnerable to desensitization by examining whether it was independent of transgenic strategy for  
430 optogenetic release. Accordingly, we repeated experiments to measure nicotinic receptor  
431 desensitization in ChAT-IRES-Cre/+ Ai32/+  $\alpha 5$ WT and  $\alpha 5$ KO mice, isolating the nicotinic  
432 response with atropine, and using the same accommodating-frequency optogenetic stimulus train  
433 used above. In these ChAT-IRES-Cre/+ Ai32/+ mice, the train response is stronger than in the  
434 ChATChR2 mice but is replicable and shows a significant genotype difference in the timing of its  
435 peak ( $t_{(29)} = 2.20$ ,  $*p = 0.03$ ), with  $\alpha 5$ KO peak occurring  $37.2 \pm 16.9$  ms after the  $\alpha 5$ WT ( $N = 4$   
436 mice per genotype). The delay is observed in the absence of a difference in the peak cholinergic  
437 current ( $\alpha 5$ WT:  $54 \pm 6$  pA vs  $\alpha 5$ KO:  $51 \pm 4$  pA, unpaired t-test:  $t_{(29)} = 0.32$ ,  $p = 0.7$ ) or in the  
438 cholinergic charge transfer ( $\alpha 5$ WT:  $21 \pm 3$  pC vs  $\alpha 5$ KO:  $24 \pm 2$  pC, unpaired t-test:  $t_{(29)} = 0.90$ ,  $p$   
439  $= 0.4$ ). In short, the properties of the train responses in the ChAT-IRES-Cre/+ Ai32/+  $\alpha 5$ WT and  
440  $\alpha 5$ KO mice are suitable for testing whether loss of  $\alpha 5$  increases vulnerability to nicotine  
441 desensitization.

442 For this experiment, the cholinergic response magnitude in voltage-clamp to a train of  
443 optogenetic stimulation was measured at different time points during the application of 100 nM  
444 nicotine (**Figure 5**). In this optogenetic line, there is again a significant interaction between the  
445 effect of nicotine exposure and genotype (2 way repeated measures ANOVA: nicotine x genotype  
446 interaction:  $F_{(4,40)} = 10.19$ ,  $****p < 0.0001$ ). Similar to results obtained in ChAT-ChR2  $\alpha 5$ KO  
447 mice, we see that ChAT-IRES-Cre/+ Ai32/+  $\alpha 5$ KO mice show almost-complete desensitization at  
448 the end of 10-minute exposure to nicotine (fraction of response at 5 min:  $0.36 \pm 0.06$ , Sidak's post  
449 hoc test:  $t_{(5)} = 10.80$ ,  $***p = 0.0005$ ; at 10 min:  $0.16 \pm 0.04$ ,  $t_{(5)} = 20.06$ ,  $****p < 0.0001$ ). While  
450 considerably milder, there is also significant nicotine-elicited desensitization in ChAT-IRES-Cre/+  
451 Ai32/+  $\alpha 5$ WT mice (fraction of response at 5 min:  $0.61 \pm 0.09$ , Sidak's post hoc test:  $t_{(5)} = 4.20$ ,  
452  $*p = 0.03$ ; at 10 min:  $0.57 \pm 0.08$ , Sidak's post hoc test:  $t_{(5)} = 5.77$ ,  $**p = 0.009$ ). The stronger  
453 optogenetic release of acetylcholine in this optogenetic line helps to illustrate the degree to which  
454 *Chrna5* enables the  $\alpha 5$ WT to resist desensitization.

455 These results confirm the critical role of *Chrna5* in protecting endogenous cholinergic  
456 signaling from desensitization. Together with the results in figures 1-4, we are able to show using  
457 two different transgenic strategies for optogenetic acetylcholine release that *Chrna5* in layer 6 of  
458 the prefrontal cortex has 2 roles: i) *Chrna5* is essential for a rapid onset of cholinergic activation  
459 and ii) *Chrna5* protects prefrontal endogenous cholinergic signaling from desensitization induced  
460 either by high acetylcholine levels or by acute exposure to nicotine.

461

462

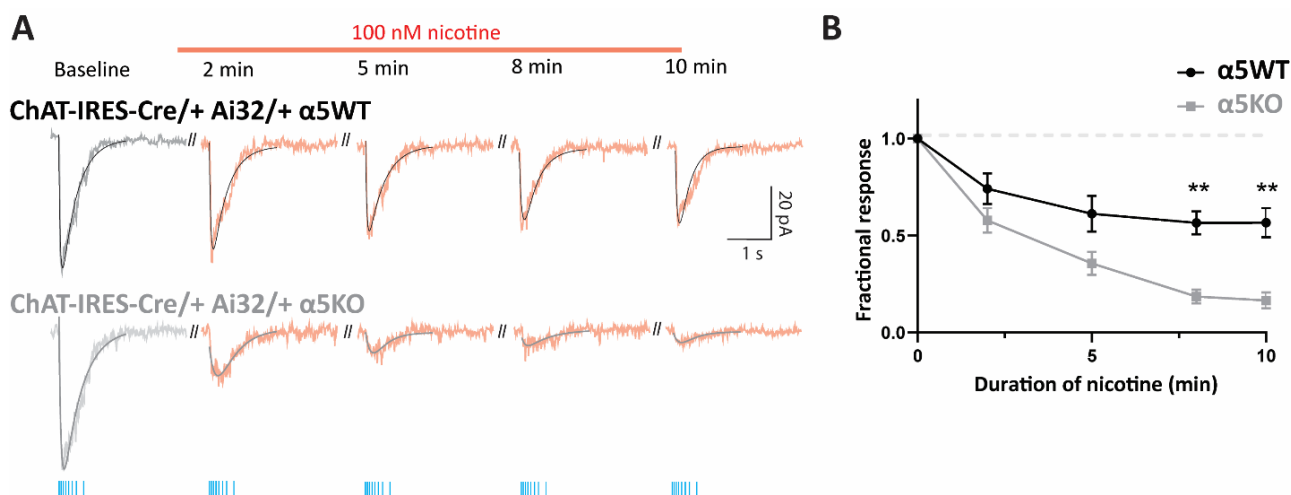

463

464 **Figure 5: *Chrna5* attenuates desensitization of endogenous cholinergic signals in a different**  
465 **optogenetic model. A,** Optogenetically evoked nicotinic responses in an  $\alpha$ 5WT and  $\alpha$ 5KO ChAT-IRES-  
466 Cre/+ Ai32/+ neuron at different time points during the application of 100 nM nicotine for 10 minutes. **B,**  
467 Time course of change in endogenous nicotinic response as nicotine is applied (2-way RM ANOVA:  
468 Genotype x nicotine interaction:  $F_{(4,12)} = 11.8$ ,  $**p < 0.001$ ; Sidak's posthoc test comparing WT and  $\alpha$ 5KO:  
469  $**p < 0.01$ ).

470

#### 471 ***Rescuing rapid cholinergic response onset by targeting an unorthodox binding site***

472 The  $\alpha$ 5KO mice show a deficit in the timing of cholinergic excitation that would delay input  
473 integration and the activation of postsynaptic partners, a finding consistent with the attention  
474 deficits observed in  $\alpha$ 5KO mice (Bailey et al., 2010). The manipulations that we have tested,  
475 including blocking presynaptic muscarinic autoinhibition (Fig 2) and inhibiting  
476 acetylcholinesterase (Fig 4), fail to rescue this slow onset of cholinergic excitation. Our optogenetic  
477 results suggest that attempts to rescue endogenous cholinergic signaling in  $\alpha$ 5KO mice must  
478 navigate a careful path between hastening response onset and avoiding desensitization. Therefore,  
479 we chose to examine a strategy of positive allosteric modulation, aiming to potentiate the nicotinic  
480 response without altering the duration of nicotinic receptor stimulation. Accordingly, we took  
481 advantage of the recently-identified  $\alpha$ - $\alpha$  nicotinic receptor binding site and its selective agonist  
482 NS9283 (Grupe et al., 2013; Olsen et al., 2013, 2014; Jain et al., 2016). Stimulation of this  
483 unorthodox nicotinic receptor binding site does not produce a current in itself but instead enhances  
484 the affinity for acetylcholine at the orthodox  $\alpha$ 4- $\beta$ 2 binding sites (Wang and Lindstrom, 2018).  
485 Such enhancement in wildtype mice improves cognitive performance on attention tasks  
486 (Timmermann et al., 2012; Mohler et al., 2014).

487 Here, we asked if the unorthodox site agonist NS9283 can rescue the onset kinetics of the  
488 endogenous cholinergic response in  $\alpha$ 5KO mice without triggering desensitization. One  
489 requirement for this approach to work is that at least a proportion of nicotinic receptors in  $\alpha$ 5KO  
490 must have adopted the  $(\alpha 4)_3(\beta 2)_2$  stoichiometry (**Figure 6A**). We measured cholinergic responses  
491 to a train of optogenetic stimulation in ChAT-ChR2  $\alpha$ 5KO mice in the presence of atropine before  
492 and after the application of 100 nM NS9283 for 5 minutes (Fig 6B-E). We found that this minimal

493 concentration of NS9283 is highly effective at speeding the onset of cholinergic activation  
 494 (increase in rising slope:  $80 \pm 30$  pA/s,  $N = 3$  mice, paired t-test:  $t_{(8)} = 2.66$ ,  $*p = 0.03$ ; Fig 6C).  
 495 NS9283 also increased the peak amplitude of the response (change:  $12 \pm 2$  pA, paired t-test:  $t_{(9)} =$   
 496  $4.99$ ,  $***p = 0.0008$ ). Further assessment of the restorative capacity of NS9283 in current-clamp  
 497 again showed that it significantly increased the onset speed of cholinergic responses (increase in  
 498 rising slope:  $12 \pm 5$  mV/s, paired t-test:  $t_{(9)} = 2.41$ ,  $*p = 0.04$ ; Fig 6E) and the response amplitude  
 499 (change:  $4 \pm 1$  mV, paired t-test:  $t_{(9)} = 5.18$ ,  $***p = 0.0006$ ). Figure 6F shows example exponential  
 500 fits to cholinergic responses in a WT,  $\alpha 5$ KO and the same  $\alpha 5$ KO neuron after application of 100  
 501 nM NS9283. We see that the application of NS9283 is able to rescue the slow onset kinetics of  
 502  $\alpha 5$ KO cholinergic responses to match the WT response. Furthermore, we observe that the rescue  
 503 of onset kinetics and potentiation caused by NS9283 is long-lasting without triggering significant  
 504 desensitization of nicotinic receptors upon subsequent cholinergic stimulation (Fig 6G). There is  
 505 no significant effect of continuous NS9283 application on the amplitude of cholinergic responses  
 506 obtained in  $\alpha 5$ KO (one-way repeated measures ANOVA:  $F_{(1.9, 3.9)} = 2.74$ ,  $p = 0.18$ ). Thus, using a  
 507 low concentration of NS9283, we are able to rescue the onset of cholinergic responses in  $\alpha 5$ KO to  
 508 achieve the rapid timing observed in WT without engaging desensitization mechanisms.

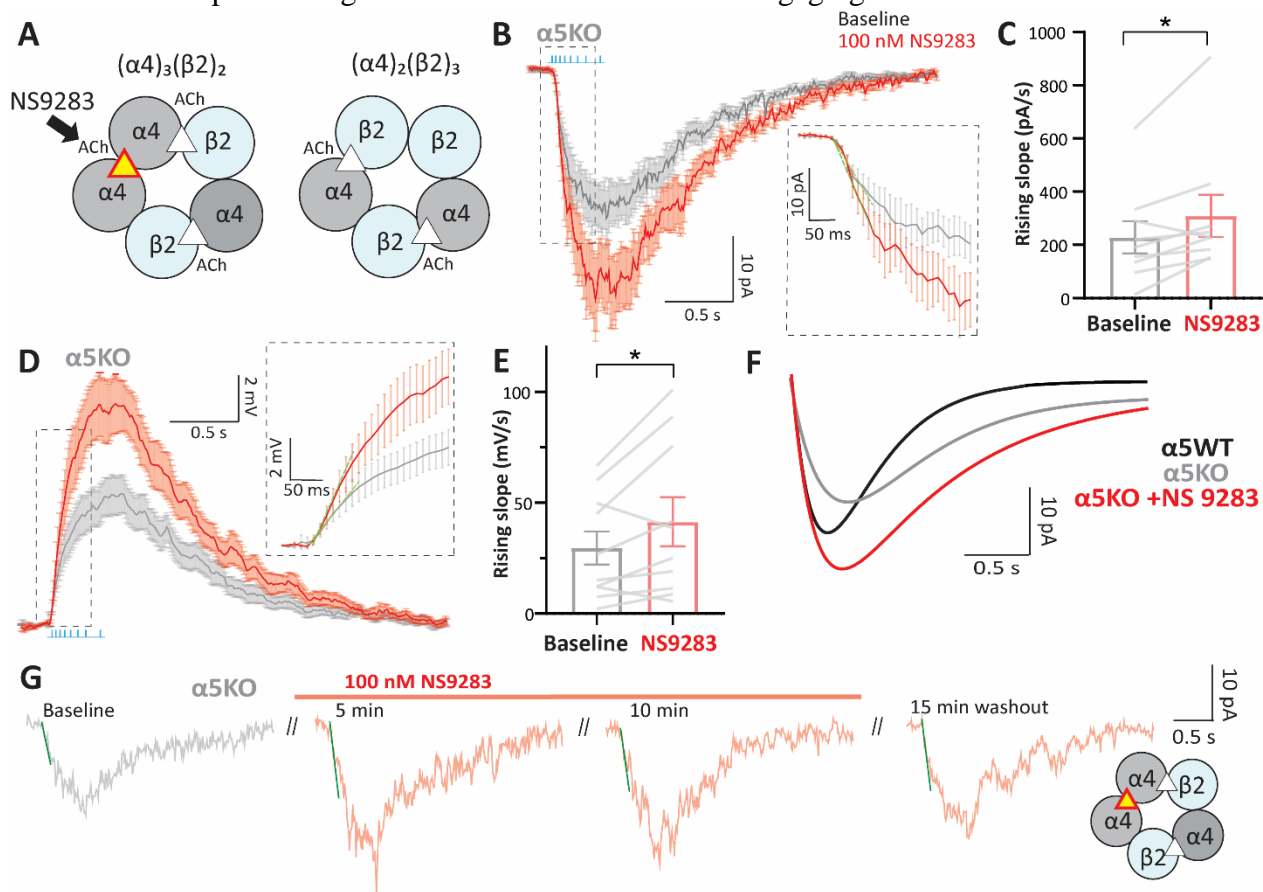

509  
 510 **Figure 6: Pharmacological restoration of rapid kinetics of endogenous cholinergic responses after**  
 511 **disruption of *Chrna5*.** **A**, Schematic illustrating the two possible stoichiometries of nicotinic receptors in  
 512 the  $\alpha 5$ KO. NS9283 is a selective agonist for the  $\alpha$ - $\alpha$  site found in  $(\alpha 4)_3(\beta 2)_2$  receptors. **B**, **D**, Average current  
 513 (B) and depolarization (D) in response to optogenetic acetylcholine release before and after the application  
 514 of 100 nM NS9283 in the  $\alpha 5$ KO ( $n = 10$  cells). Atropine was present throughout to isolate the nicotinic



515 response. Inset: Fast rising phase of the response with linear fit (green) to the first 50ms of the response  
516 from light onset **C, E**, Bar graph showing the rising slope before and after NS9283 for (C) the current (paired  
517 t-test:  $t_{(8)} = 2.66$ ,  $*p = 0.03$ ) and (E) the depolarization (paired t-test:  $t_{(9)} = 2.41$ ,  $*p = 0.04$ ) determined from  
518 the linear fit in  $\alpha 5$ KO. NS9283 causes a significant increase in onset speed of cholinergic responses in  
519  $\alpha 5$ KO. **F**, Example exponential fits to cholinergic responses in a WT,  $\alpha 5$ KO and the same  $\alpha 5$ KO neuron  
520 after application of 100nM NS9283. Application of NS9283 rescues slow onset kinetics of  $\alpha 5$ KO  
521 cholinergic responses to match the WT. **G**, Optogenetically-evoked nicotinic responses along with linear  
522 fits of the same  $\alpha 5$ KO neuron shown in (F) at 5 and 10 minutes of NS9283 application and following a 15-  
523 minute washout period. Potentiation caused by NS9283 is long-lasting and optogenetic release of  
524 endogenous acetylcholine can be repeated without triggering desensitization of nicotinic receptors.

525

## 526 **Discussion**

527 Our results reveal that the  $\alpha 5$  subunit encoded by *Chrna5* is necessary to generate rapid onset of  
528 responses to endogenous acetylcholine released optogenetically. In this way, it regulates the timing  
529 of the peak cholinergic modulation of layer 6 pyramidal neurons in prefrontal cortex, but not its  
530 magnitude. In addition, the  $\alpha 5$  subunit protects the endogenous cholinergic signaling from  
531 desensitization induced by prolonged exposure to acetylcholine or acute nicotine. Finally, we show  
532 that the slow onset of cholinergic responses in mice lacking the  $\alpha 5$  subunit can be rescued using  
533 NS9283, a selective agonist for the unorthodox  $(\alpha 4)_3(\beta 2)_2$  nicotinic receptors.

### 534 ***Chrna5 permits a rapid response to endogenous cholinergic signaling***

535 Rapid cholinergic modulation of the prefrontal cortex is critical for attention. Layer 6 pyramidal  
536 neurons are key players in this phenomenon, since a large proportion are corticothalamic and can  
537 exert a direct top-down influence on incoming sensory inputs (Kassam et al., 2008; Thomson,  
538 2010). Layer 6 corticothalamic neurons express the  $\alpha 5$  nicotinic receptor subunit encoded by  
539 *Chrna5* which is critical for the performance of demanding attention tasks (Bailey et al., 2010).  
540 We observe that neurons lacking  $\alpha 5$  showed significantly impaired kinetics in responding to  
541 endogenous acetylcholine release, exhibiting a much slower rise and delayed time of peak. The  
542 slow onset of cholinergic activation in  $\alpha 5$ KO results in a delay of up to ~100 ms in initiation of  
543 acetylcholine induced spiking in layer 6 neurons. We posit that the delay in cholinergic activation  
544 in the  $\alpha 5$ KO could result in failure to integrate inputs or activate postsynaptic targets within a  
545 critical window critical for the detection of sensory cues, leading to attention deficits observed in  
546 these mice (Bailey et al., 2010).

### 547 ***Temporal constraints on endogenous cholinergic signaling***

548 We demonstrate that the cholinergic inputs to the layer 6 pyramidal neurons are under strong M2  
549 muscarinic receptor mediated autoinhibition of release (~ 40% suppression of the full response by  
550 active presynaptic M2 receptors) in both WT and  $\alpha 5$ KO. Releasing the autoinhibitory brake on  
551 acetylcholine release does not improve the aberrant cholinergic kinetics in the  $\alpha 5$ KO. However,  
552 the strong muscarinic autoinhibition of endogenous cholinergic release onto layer 6 pyramidal  
553 neurons would be predicted to restrict the emphasis onto the fast-rising phase of a response to a  
554 train of cholinergic stimuli. The acetylcholine released to the first stimulus will activate the  
555 presynaptic M2 receptors and suppress further release due to the subsequent stimuli. The potential

556 for such autoinhibition highlights the importance of the  $\alpha 5$  nicotinic subunit in generating an initial  
557 rapid response to the acetylcholine release. Together with the high expression of the metabolic  
558 enzyme acetylcholinesterase in deep layers of the prefrontal cortex (Sendemir et al., 1996;  
559 Anderson et al., 2009), our results suggest that prefrontal layer 6 cholinergic modulation is  
560 hardwired for rapid transient effects with *Chrna5* ensuring rapid postsynaptic activation.

### 561 ***Cognitive ramifications of rapid cholinergic signaling***

562 Acetylcholine release in the cortex has been shown to vary on rapid timescales with behavioural  
563 state- cholinergic axon activation in the barrel cortex correlates rapidly with whisking behaviour  
564 (Eggermann et al., 2014). Similarly, activity of cholinergic axons in the auditory cortex rapidly  
565 shifts and is predictive of behavioural context (Kuchibhotla et al., 2017). Fast cholinergic transients  
566 are observed in the prefrontal cortex in association with rewards, and cue detection on sustained  
567 attention tasks (Parikh et al., 2007; Gritton et al., 2016; Teles-Grilo Ruivo et al., 2017b). Prefrontal  
568 nicotinic receptors are required for the initial transition from low gamma to high gamma states  
569 coinciding with cue presentation in an attention task (Howe et al., 2017). The attention deficits  
570 observed in mice lacking *Chrna5* performing a 5 choice serial reaction time test were also critically  
571 dependent on timing (Bailey et al., 2010):  $\alpha 5$ KO mice were impaired only at the briefest and most-  
572 demanding stimulus durations. The slower cholinergic activation of layer 6 corticothalamic  
573 neurons in  $\alpha 5$ KO would be consistent with a failure to detect brief cues within a critical window  
574 for integration.

### 575 ***Chrna5 to protect the synaptic cholinergic response***

576 While rapid cholinergic signaling in the PFC is critical for detection of sensory cues, cholinergic  
577 tone in the PFC is important under challenging conditions of sustained attention (Sarter and Lustig,  
578 2019, 2020). High cholinergic tone in the PFC is associated with sustained attention and top down  
579 attentional control in the presence of distractor challenges, and can well last beyond the task  
580 duration (Himmelheber et al., 2000; St. Peters et al., 2011; Paolone et al., 2012). Prefrontal  
581 acetylcholine levels also greatly increase during conditions requiring high cognitive effort and  
582 stress (Mark et al., 1996; Pepeu and Giovannini, 2004; Teles-Grilo Ruivo et al., 2017a). To  
583 replicate this scenario *ex vivo*, we prolonged acetylcholine presence by blocking  
584 acetylcholinesterase irreversibly and examined the role of *Chrna5*. This experiment revealed a  
585 sharp dichotomy between the genotypes, where cholinergic responses after acetylcholinesterase  
586 block were much smaller in the  $\alpha 5$ KO compared to the WT. Furthermore, acute exposure to a low  
587 level of nicotine thought to mimic the concentrations seen in smokers (Rose et al., 2010) sharply  
588 attenuated synaptic cholinergic transmission in the  $\alpha 5$ KO, while WT cholinergic transmission was  
589 resilient, revealing that the  $\alpha 5$  nicotinic subunit has a critical role in protecting against  
590 desensitization. These experiments demonstrate using endogenous acetylcholine release to  
591 physiological stimulation patterns, a critical role for the  $\alpha 5$  subunit in conferring a protective role  
592 against desensitization during elevated cholinergic tone or acute nicotine exposure.

### 593 ***A novel treatment approach and clinical relevance***

594 The loss of *Chrna5* causes profound attention deficits (Bailey et al., 2010; Howe et al., 2018) and  
595 it is of great interest to identify pharmacological interventions to correct this dysfunction. However,  
596 the vulnerability of  $\alpha 5$ KO animals to complete desensitization of their endogenous cholinergic

597 signaling is of utmost importance when considering approaches to treat the attention deficits with  
598 cholinergic modulators. Treatment with cholinesterase inhibitors in animals lacking the  $\alpha 5$  subunit  
599 is problematic as it could engage powerful desensitization of endogenous prefrontal cholinergic  
600 signaling. We instead show that aberrant cholinergic kinetics which may underlie attention deficits  
601 in  $\alpha 5$ KO animals can be rescued partly by NS9283, an agonist for the unorthodox  $\alpha$ - $\alpha$  binding site,  
602 that allosterically enhances nicotinic receptor affinity without causing desensitization. A low  
603 concentration of NS9283 was able to restore the slow onset of synaptic cholinergic responses in  
604  $\alpha 5$ KO to WT levels. NS9283 has been previously shown to improve attentional performance in  
605 wildtype animals, pointing to an underestimated potential of this drug to improve attention in  
606 compromised states (Timmermann et al., 2012; Mohler et al., 2014). Our work provides a novel  
607 pharmacological target-NS9283 which could be used to physiologically manipulate endogenous  
608 cholinergic signaling to improve attention in pathological states. This may be particularly relevant  
609 for the treatment of attention disorders in humans carrying prevalent non-functional  
610 polymorphisms in the *Chrna5* gene (Bierut et al., 2008).

611           Recent examinations of the cholinergic system have shown great interest in mechanisms  
612 underlying diverse spatiotemporal scales of cholinergic signaling in the cortex (Disney and Higley,  
613 2020; Sarter and Lustig, 2020). Our study reveals a specialized role of the  $\alpha 5$  nicotinic receptor  
614 subunit in generating the rapid cholinergic modulation of the prefrontal cortex known to be critical  
615 for cognition. Such kinetic properties may define critical windows for cognitive processing. We  
616 also show that the  $\alpha 5$  nicotinic subunit protects rapid cholinergic signaling from desensitization  
617 induced by elevated acetylcholine levels or nicotine exposure. Finally, we demonstrate that rapid  
618 cholinergic signaling can be rescued in the absence of  $\alpha 5$  without triggering desensitization by  
619 allosterically enhancing nicotinic receptors with NS9283, an agonist for the unorthodox binding  
620 site. Together, this work improves our understanding of cholinergic modulation of attention circuits  
621 and identifies a pharmacological target to restore the rapid kinetics of cholinergic signaling in  
622 pathological conditions.

623  
624  
625  
626  
627  
628  
629  
630  
631  
632  
633  
634

## 635 **References**

- 636 Anderson LA, Christianson GB, Linden JF (2009) Mouse auditory cortex differs from visual and  
637 somatosensory cortices in the laminar distribution of cytochrome oxidase and  
638 acetylcholinesterase. *Brain Res* 1252:130–142.
- 639 Baenziger JE, daCosta CJB (2013) Molecular mechanisms of acetylcholine receptor-lipid  
640 interactions: from model membranes to human biology. *Biophys Rev* 5:1–9.
- 641 Bailey CDC, De Biasi M, Fletcher PJ, Lambe EK (2010) The nicotinic acetylcholine receptor  
642 alpha5 subunit plays a key role in attention circuitry and accuracy. *J Neurosci* 30:9241–  
643 9252.
- 644 Bierut LJ et al. (2008) Variants in the Nicotinic Receptors Alter the Risk for Nicotine  
645 Dependence. *Am J Psychiatry* 165:1163.
- 646 Dalley JW, Theobald DE, Bouger P, Chudasama Y, Cardinal RN, Robbins TW (2004) Cortical  
647 Cholinergic Function and Deficits in Visual Attentional Performance in Rats Following 192  
648 IgG-Saporin-induced Lesions of the Medial Prefrontal Cortex. *Cereb Cortex* 14:922–932.
- 649 Disney AA, Higley MJ (2020) Diverse Spatiotemporal Scales of Cholinergic Signaling in the  
650 Neocortex. *J Neurosci* 40:720–725.
- 651 Eggermann E, Kremer Y, Crochet S, Petersen CCH (2014) Cholinergic Signals in Mouse Barrel  
652 Cortex during Active Whisker Sensing. *Cell Rep* 9:1654–1660.
- 653 Goldman-Rakic (1995) Cellular Basis of Working Memory Review. *Neuron* 14:477–485.
- 654 Gritton HJ, Howe WM, Mallory CS, Hetrick VL, Berke JD, Sarter M (2016) Cortical cholinergic  
655 signaling controls the detection of cues. *Proc Natl Acad Sci U S A* 113:E1089.
- 656 Grupe M, Jensen AA, Ahring PK, Christensen JK, Grunnet M (2013) Unravelling the mechanism  
657 of action of NS9283, a positive allosteric modulator of  $(\alpha 4)_3(\beta 2)_2$  nicotinic ACh receptors.  
658 *Br J Pharmacol* 168:2000–2010.
- 659 Han W, Zhang T, Ni T, Zhu L, Liu D, Chen G, Lin H, Chen T, Guan F (2019) Relationship of  
660 common variants in *CHRNA5* with early-onset schizophrenia and executive function.  
661 *Schizophr Res* 206:407–412.
- 662 Harpsøe K, Ahring PK, Christensen JK, Jensen ML, Peters D, Balle T (2011) Unraveling the  
663 high- and low-sensitivity agonist responses of nicotinic acetylcholine receptors. *J Neurosci*  
664 31:10759–10766.
- 665 Hedrick T, Danskin B, Larsen RS, Ollerenshaw D, Groblewski P, Valley M, Olsen S, Waters J  
666 (2016) Characterization of Channelrhodopsin and Archaelhodopsin in Cholinergic Neurons  
667 of Cre-Lox Transgenic Mice Coulson EJ, ed. *PLoS One* 11:e0156596.
- 668 Hedrick T, Waters J (2015) Acetylcholine excites neocortical pyramidal neurons via nicotinic  
669 receptors. *J Neurophysiol* 113:2195–2209.
- 670 Himmelheber AM, Sarter M, Bruno JP (2000) Increases in cortical acetylcholine release during  
671 sustained attention performance in rats. *Cogn Brain Res* 9:313–325.
- 672 Hong LE, Yang X, Wonodi I, Hodgkinson CA, Goldman D, Stine OC, Stein ES, Thaker GK  
673 (2011) A *CHRNA5* allele related to nicotine addiction and schizophrenia. *Genes Brain*  
674 *Behav* 10:530–535.
- 675 Howe WM, Brooks JL, Tierney PL, Pang J, Rossi A, Young D, Dlugolenski K, Guillmette E,  
676 Roy M, Hales K, Kozak R (2018)  $\alpha 5$  nAChR modulation of the prefrontal cortex makes  
677 attention resilient. *Brain Struct Funct* 223:1035–1047.
- 678 Howe WM, Gritton HJ, Lusk NA, Roberts EA, Hetrick VL, Berke JD, Sarter M (2017)  
679 Acetylcholine Release in Prefrontal Cortex Promotes Gamma Oscillations and Theta-  
680 Gamma Coupling during Cue Detection. *J Neurosci* 37:3215–3230.
- 681 Jain A, Kuryatov A, Wang J, Kamenecka TM, Lindstrom J (2016) Unorthodox acetylcholine

- 682 binding sites formed by  $\alpha 5$  and  $\beta 3$  accessory subunits in  $\alpha 4\beta 2^*$  nicotinic acetylcholine  
683 receptors. *J Biol Chem* 291:23452–23463.
- 684 Kassam SM, Herman PM, Goodfellow NM, Alves NC, Lambe EK (2008) Developmental  
685 excitation of corticothalamic neurons by nicotinic acetylcholine receptors. *J Neurosci*  
686 28:8756–8764.
- 687 Kuchibhotla K V, Gill J V, Lindsay GW, Papadoyannis ES, Field RE, Sten TAH, Miller KD,  
688 Froemke RC (2017) Parallel processing by cortical inhibition enables context-dependent  
689 behavior. *Nat Neurosci* 20:62–71.
- 690 Kumar P, Ohana O (2008) Inter- and Intralaminar Subcircuits of Excitatory and Inhibitory  
691 Neurons in Layer 6a of the Rat Barrel Cortex. *J Neurophysiol* 100:1909–1922.
- 692 Kuryatov A, Onksen J, Lindstrom J (2008) Roles of accessory subunits in  $\alpha 4\beta 2^*$  nicotinic  
693 receptors. *Mol Pharmacol*.
- 694 Ledergerber D, Larkum ME (2010) Properties of layer 6 pyramidal neuron apical dendrites. *J*  
695 *Neurosci* 30:13031–13044.
- 696 Lee MG, Hassani OK, Alonso A, Jones BE (2005) Cholinergic basal forebrain neurons burst with  
697 theta during waking and paradoxical sleep. *J Neurosci* 25:4365–4369.
- 698 Levey AI, Kitt CA, Simonds WF, Price DL, Brann MR (1991) Identification and localization of  
699 muscarinic acetylcholine receptor proteins in brain with subtype-specific antibodies. *J*  
700 *Neurosci* 11:3218–3226.
- 701 Mark G., Rada P., Shors T. (1996) Inescapable stress enhances extracellular acetylcholine in the  
702 rat hippocampus and prefrontal cortex but not the nucleus accumbens or amygdala.  
703 *Neuroscience* 74:767–774.
- 704 Matta JA, Gu S, Davini WB, Lord B, Siuda ER, Harrington AW, Bredt DS (2017) NACHO  
705 Mediates Nicotinic Acetylcholine Receptor Function throughout the Brain. *Cell Rep*  
706 19:688–696.
- 707 Mazzaferro S, Bermudez I, Sine SM (2017)  $\alpha 4\beta 2$  Nicotinic Acetylcholine Receptors:  
708 RELATIONSHIPS BETWEEN SUBUNIT STOICHIOMETRY AND FUNCTION AT  
709 THE SINGLE CHANNEL LEVEL. *J Biol Chem* 292:2729–2740.
- 710 Miller EK, Cohen JD (2001) An Integrative Theory of Prefrontal Cortex Function. *Annu Rev*  
711 *Neurosci* 24:167–202.
- 712 Mohler EG, Franklin SR, Rueter LE (2014) Discriminative-stimulus effects of NS9283, a  
713 nicotinic  $\alpha 4\beta 2^*$  positive allosteric modulator, in nicotine-discriminating rats.  
714 *Psychopharmacology (Berl)* 231:67–74.
- 715 Nasirova N, Quina LA, Agosto-Marlin IM, Ramirez J, Lambe EK, Turner EE (2019) Dual  
716 recombinase fate mapping reveals a transient cholinergic phenotype in multiple populations  
717 of developing glutamatergic neurons. *J Comp Neurol:cne.24753*.
- 718 Olsen JA, Ahring PK, Kastrup JS, Gajhede M, Balle T (2014) Structural and functional studies of  
719 the modulator NS9283 reveal agonist-like mechanism of action at  $\alpha 4\beta 2$  nicotinic  
720 acetylcholine receptors. *J Biol Chem* 289:24911–24921.
- 721 Olsen JA, Kastrup JS, Peters D, Gajhede M, Balle T, Ahring PK (2013) Two distinct allosteric  
722 binding sites at  $\alpha 4\beta 2$  nicotinic acetylcholine receptors revealed by NS206 and NS9283 give  
723 unique insights to binding activity-associated linkage at cys-loop receptors. *J Biol Chem*  
724 288:35997–36006.
- 725 Paolone G, Lee TM, Sarter M (2012) Time to Pay Attention: Attentional Performance Time-  
726 Stamped Prefrontal Cholinergic Activation, Diurnality, and Performance. *J Neurosci*  
727 32:12115–12128.
- 728 Paradiso KG, Steinbach JH (2003) Nicotine is highly effective at producing desensitization of rat

- 729        alpha4beta2 neuronal nicotinic receptors. *J Physiol* 553:857–871.
- 730 Parikh V, Kozak R, Martinez V, Sarter M (2007) Prefrontal acetylcholine release controls cue  
731 detection on multiple timescales. *Neuron* 56:141–154.
- 732 Paxinos G, Franklin K (2004) Paxinos and Franklin's the Mouse Brain in Stereotaxic  
733 Coordinates.
- 734 Pepeu G, Giovannini MG (2004) Changes in acetylcholine extracellular levels during cognitive  
735 processes. *Learn Mem* 11:21–27.
- 736 Picciotto MR, Addy NA, Mineur YS, Brunzell DH (2008) It is not "either/or";  
737 activation and desensitization of nicotinic acetylcholine receptors both contribute to  
738 behaviors related to nicotine addiction and mood. *Prog Neurobiol* 84:329–342.
- 739 Quick MW, Lester RAJ (2002) Desensitization of neuronal nicotinic receptors. *J Neurobiol*  
740 53:457–478.
- 741 Rose JE, Mukhin AG, Lokitz SJ, Turkington TG, Herskovic J, Behm FM, Garg S, Garg PK  
742 (2010) Kinetics of brain nicotine accumulation in dependent and nondependent smokers  
743 assessed with PET and cigarettes containing 11C-nicotine. *Proc Natl Acad Sci U S A*  
744 107:5190–5195.
- 745 Sarter M, Lustig C (2019) Cholinergic double duty: cue detection and attentional control. *Curr*  
746 *Opin Psychol* 29:102–107.
- 747 Sarter M, Lustig C (2020) Forebrain Cholinergic Signaling: Wired and Phasic, Not Tonic, and  
748 Causing Behavior. *J Neurosci* 40:712–719.
- 749 Schuch JB, Polina ER, Rovaris DL, Kappel DB, Mota NR, Cupertino RB, Silva KL, Guimarães-  
750 da-Silva PO, Karam RG, Salgado CAI, White MJ, Rohde LA, Grevet EH, Bau CHD (2016)  
751 Pleiotropic effects of Chr15q25 nicotinic gene cluster and the relationship between smoking,  
752 cognition and ADHD. *J Psychiatr Res* 80:73–78.
- 753 Sendemir E, Erzurumlu RS, Jhaveri S (1996) Differential expression of acetylcholinesterase in  
754 the developing barrel cortex of three rodent species. *Cereb Cortex* 6:377–387.
- 755 Sparks DW, Tian MK, Sargin D, Venkatesan S, Intson K, Lambe EK (2018) Opposing  
756 cholinergic and serotonergic modulation of layer 6 in prefrontal cortex. *Front Neural*  
757 *Circuits* 11.
- 758 St. Peters M, Demeter E, Lustig C, Bruno JP, Sarter M (2011) Enhanced control of attention by  
759 stimulating mesolimbic-cortical cholinergic circuitry. *J Neurosci* 31:9760–9771.
- 760 Tapia L, Kuryatov A, Lindstrom J, Wolfe BB, Kellar KJ (2007) Ca<sup>2+</sup> permeability of the  
761 (alpha4)<sub>3</sub>(beta2)<sub>2</sub> stoichiometry greatly exceeds that of (alpha4)<sub>2</sub>(beta2)<sub>3</sub> human  
762 acetylcholine receptors. *Mol Pharmacol* 71:769–776.
- 763 Teles-Grilo Ruivo LM, Baker KL, Conway MW, Kinsley PJ, Gilmour G, Phillips KG, Isaac JTR,  
764 Lowry JP, Mellor JR (2017a) Coordinated Acetylcholine Release in Prefrontal Cortex and  
765 Hippocampus Is Associated with Arousal and Reward on Distinct Timescales. *Cell Rep*  
766 18:905–917.
- 767 Teles-Grilo Ruivo LM, Baker KL, Conway MW, Kinsley PJ, Gilmour G, Phillips KG, Isaac JTR,  
768 Lowry JP, Mellor JR (2017b) Coordinated Acetylcholine Release in Prefrontal Cortex and  
769 Hippocampus Is Associated with Arousal and Reward on Distinct Timescales. *Cell Rep*  
770 18:905–917.
- 771 Thomson AM (2010) Neocortical layer 6, a review. *Front Neuroanat* 4:13.
- 772 Tian MK, Bailey CDC, De Biasi M, Picciotto MR, Lambe EK (2011) Plasticity of prefrontal  
773 attention circuitry: upregulated muscarinic excitability in response to decreased nicotinic  
774 signaling following deletion of  $\alpha 5$  or  $\beta 2$  subunits. *J Neurosci* 31:16458–16463.
- 775 Timmermann DB, Sandager-Nielsen K, Dyhring T, Smith M, Jacobsen AM, Nielsen E, Grunnet

776 M, Christensen JK, Peters D, Kohlhaas K, Olsen GM, Ahring PK (2012) Augmentation of  
777 cognitive function by NS9283, a stoichiometry-dependent positive allosteric modulator of  
778  $\alpha 2$ - and  $\alpha 4$ -containing nicotinic acetylcholine receptors. *Br J Pharmacol* 167:164–182.  
779 Unal CT, Golowasch JP, Zaborszky L (2012) Adult mouse basal forebrain harbors two distinct  
780 cholinergic populations defined by their electrophysiology. *Front Behav Neurosci* 6:21.  
781 Wada E, McKinnon D, Heinemann S, Patrick J, Swanson LW (1990) The distribution of mRNA  
782 encoded by a new member of the neuronal nicotinic acetylcholine receptor gene family ( $\alpha 5$ )  
783 in the rat central nervous system. *Brain Res* 526:45–53.  
784 Wang J, Kuryatov A, Sriram A, Jin Z, Kamenecka TM, Kenny PJ, Lindstrom J (2015) An  
785 accessory agonist binding site promotes activation of  $\alpha 4\beta 2^*$  nicotinic acetylcholine  
786 receptors. *J Biol Chem* 290:13907–13918.  
787 Wang J, Lindstrom J (2018) Orthosteric and allosteric potentiation of heteromeric neuronal  
788 nicotinic acetylcholine receptors. *Br J Pharmacol* 175:1805–1821.  
789 Winzer-Serhan UH, Leslie FM (2005) Expression of alpha5 nicotinic acetylcholine receptor  
790 subunit mRNA during hippocampal and cortical development. *J Comp Neurol* 481:19–30.  
791 Yang D, Günter R, Qi G, Radnikow G, Feldmeyer D (2019) Cell Type-Specific Modulation of  
792 Layer 6A Excitatory Microcircuits by Acetylcholine in Rat Barrel Cortex. *bioRxiv*:701318.  
793 Zhang W, Basile AS, Gomeza J, Volpicelli LA, Levey AI, Wess J (2002) Characterization of  
794 central inhibitory muscarinic autoreceptors by the use of muscarinic acetylcholine receptor  
795 knock-out mice. *J Neurosci* 22:1709–1717.  
796 Zhao S, Ting JT, Atallah HE, Qiu L, Tan J, Gloss B, Augustine GJ, Deisseroth K, Luo M,  
797 Graybiel AM, Feng G (2011a) Cell type-specific channelrhodopsin-2 transgenic mice for  
798 optogenetic dissection of neural circuitry function. *Nat Methods* 8:745–752.  
799 Zhao S, Ting JT, Atallah HE, Qiu L, Tan J, Gloss B, Augustine GJ, Deisseroth K, Luo M,  
800 Graybiel AM, Feng G (2011b) Cell type-specific channelrhodopsin-2 transgenic mice for  
801 optogenetic dissection of neural circuitry function. *Nat Methods* 8:745–752.  
802  
803  
804  
805  
806  
807  
808  
809  
810  
811  
812  
813  
814  
815  
816
